# Supplementary material
Source: publisher figshare collection journal article supplement (https://gsajournals.figshare.com/ndownloader/files/27930216)
Supplement: Supplementary file 1 [file 27930216]

## Sheet: within Pop. Crosses
@15 degress
Cross		Number of reads (75bp paired-end)
Line 1	Line 2	larve	pupa	adult
EA117N	EA126N	21096068	21679131	49390134
EA22N	EA59N	32605330	22984357	149453346
EA70N	EA2N	22591114	17307465	34102688
EA91N	EA103N	24293804	36403063	33935722
EA13N	EA84N	21434358	22028469	32457310
EA93N	EA58N	30868680	22130842	92490284
EA87N	EA37N	23985028	23124726	28614490
EA90N	EA45N	23056308	22232524	23158471
EF122N	EF19N	23334836	23234720	31345051
EF54N	EF93N	29517080	24417031	29483609
EF117N	EF81N	22329838	24444210	27535357
EF64N	EF15N	22637438	22679043	31988033
EF101N	EF74N	28117608	24976636	28648853
EF6N	EF110N	22704787	26975495	27066805
EF95N	EF59N	23484610	23601067	66746805
EF88N	EF43N	27886537	21551474	28059267
EG31N	EG26N	22270862	27870324	23516180
EG57N	EG12N	23860746	22790985	239421741
EG69N	EG70N	23402768	21603226	32405913
EG33N	EG59N	21471155	21710553	37974185
EG36N	EG28N	35896608	22203846	27173544
EG46N	EG49N	24274859	20472779	28258055
EG50N	EG55N	22818930	24949613	23530170
EG74N	EG48N	23549177	23107301	25773830
FR173N	FR260N	21366304	22897779	35612556
FR320N	FR110N	23889622	25801458	21499828
FR37N	FR48N	26178237	21183977	28603272
FR73N	FR135N	25157902	21740240	30851473
FR109N	FR158N	22815546	25233099	21428660
FR16N	FR222N	21020699	22716413	26948211
FR19N	FR112N	27247461	29768505	30592936
FR225N	FR54N	20500224	26502390	21949989
SP107N	SP291N	23046171	25532028	28758436
SP159N	SP87N	19458648	23766640	25831867
SP15N	SP249N	21859969	22931141	28705995
SP103N	SP133N	22358146	31540220	28862842
SP17N	SP39N	22004772	21563909	39631976
SP315N	SP69N	22601378	26711259	28594171
SP19N	SP1N	22191233	23511912	25515738
SP279N	SP61N	25739436	31396527	25402387
SD18N	SD151N	23457035	22875581	19775518
SD63N	SD27N	24625814	37290560	27618877
SD132N	SD21N	24589490	22941732	20295566
SD135N	SD43N	25690354	21366762	25255284
SD3N	SD145N	24828257	22607187	24234037
SD78N	SD55N	25722509	21933462	23341885
SD116N	SD113N	23935341	21836710
SD114N	SD54N	20586185	22778142	27016628

## Sheet: between Pop. Crosses
@15 degress
Line1	Line2	Number of reads (75bp paired-end)
EA2N	EF101N	25455985
EA22N	EF53N	29713790
EA126N	EF120N	24282192
EA59N	EF93N	18101555
EG36N	FR109N	22086814
EG50N	FR225N	26000792
EG48N	FR16N	25845178
EG12N	FR320N	26103427
SD18N	SP15N	21098878
SD21N	SP87N	28840438
SD78N	SP103N	24114650

## Sheet: Parental Lines
@15 degress
Line	Number of reads (75bp paired-end)
EA2N	22926668
EA22N	33335848
EA126N	38896089
EA59N	26622394
EF101N	21909360
EF53N	22608829
EF120N	21461343
EF93N	23251815
EG36N	23130416
EG50N	23695410
EG48N	34462668
EG12N	20871940
FR109N	24807844
FR225N	32869137
FR16N	21479919
FR320N	20610859
SP15N	28905710
SP17N	24800628
SP87N	22116632
SP103N	23734983
SD18N	25216688
SD54N	31279056
SD21N	24021878
SD78N	20384118
